# Supplementary material
Source: publisher figshare collection journal article supplement (https://frontiersin.figshare.com/ndownloader/files/13169456)
Supplement: Supplementary file [file 13169456]

**BfvR, an AraC-family regulator, controls biofilm formation and pH6 antigen production in  
opposite ways in *Yersinia pestis* biovar Microtus**

Haihong Fang 1, 2†, Lei Liu 3†, Yiquan Zhang 4, Huiying Yang1, Yanfeng Yan1,

Xiaojuan Ding5, Yanping Han1, Dongsheng Zhou1#, Ruifu Yang1#

*1State Key Laboratory of Pathogen and Biosecurity, Beijing Institute of Microbiology and  
Epidemiology, Beijing 100071, China;*

*2 Division of Biology, Beijing Academy, Beijing 100028, China;*

*3Department of Blood Transfusion, Wuhan General Hospital of PLA, Wuhan 430070, Hubei,  
China;*

*4School of Medicine, Jiangsu University, Zhenjiang 212013, Jiangsu, China;*

*5Department of Microbiology, Anhui Medical University, Hefei 230032, Anhui, China;*

† Haihong Fang and Lei Liu contributed equally to this work.

Short running title: BfvR controls biofilm and virulence

**#Corresponding authors:**

Ruifu Yang, E-mail: ruifuyang@gmail.com

Dongsheng Zhou, E-mail: dongshengzhou1977@gmail.com

## Abstract

Biofilm formation is critical for blocking flea foregut and hence for transmission of *Y. pestis* by flea biting. In this study, we identified the regulatory role of the AraC-family transcriptional regulator BfvR (YPO1737 in strain CO92) in biofilm formation and virulence of *Yersinia pestis* biovar Microtus. Crystal violet staining, *Caenorhabditis elegans* biofilm assay, colony morphology assay, intracellular c-di-GMP concentration determination, and BALB/c mice challenge were employed to reveal that BfvR enhanced *Y. pestis* biofilm formation while repressed its virulence in mice. Further molecular biological assays demonstrated that BfvR directly stimulated the expression of *hmsHFRS*, *waaAE-coaD*, and *hmsCDE*, which, in turn, affected the production of exopolysaccharide, LPS and c-di-GMP, respectively. In addition, BfvR directly and indirectly repressed *psaABC* and *psaEF* transcription, respectively. We concluded that the modulation of biofilm- and virulence-related genes by BfvR led to increased biofilm formation and reduced virulence of *Y. pestis* biovar Microtus.

**Keywords:** *Yersinia pestis*; BfvR; biofilm; virulence; transcriptional regulation.

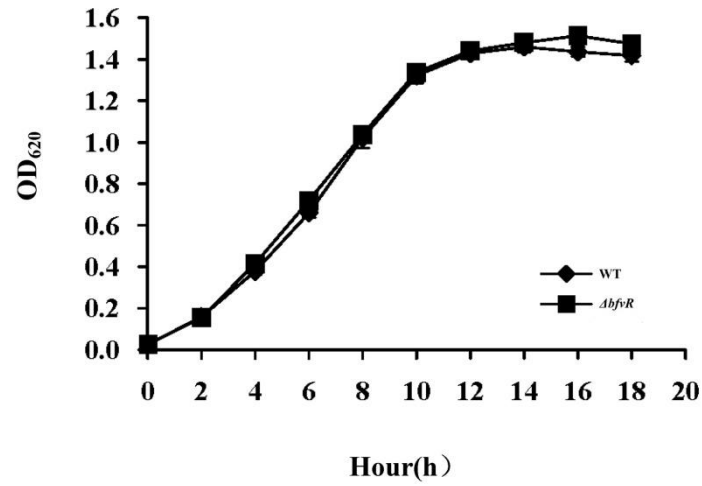

**FIGURE S1. Bacterial growth curves.** Overnight cell cultures at an OD<sub>620</sub> value of approximately 1.0 were diluted 1:20 into 18 ml of LB medium with a pH value of 6.0. Bacteria were then grown at 26 °C with shaking at 230 rpm, and the OD<sub>620</sub> values were monitored at 3-h intervals until the cell cultures reached the stationary growth phase. Three individual cultures (i.e., three biological replicates) were determined for each strain.

OD 620: Optical density at 620 nm; WT: Wild-type.

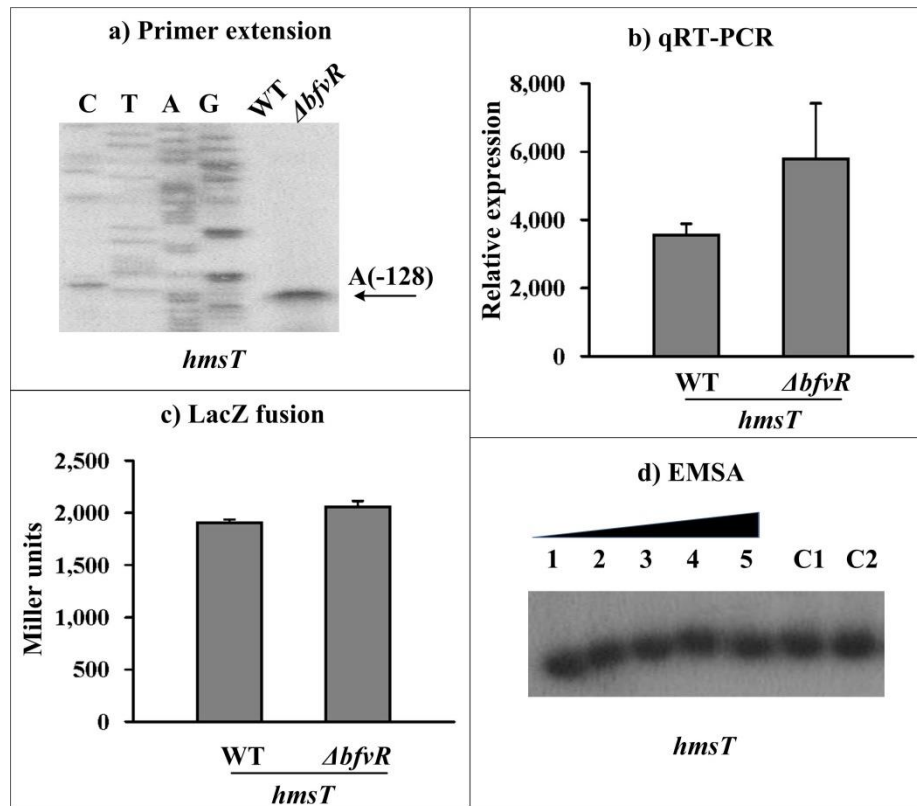

**FIGURE S2. Regulation of *hmsT* by BfvR.** See FIGURE 2 for the annotations of primer extension (a), quantitative RT-PCR (b), LacZ fusion (c), and EMSA (d). The promoter-proximal region was amplified from -410 to +42.

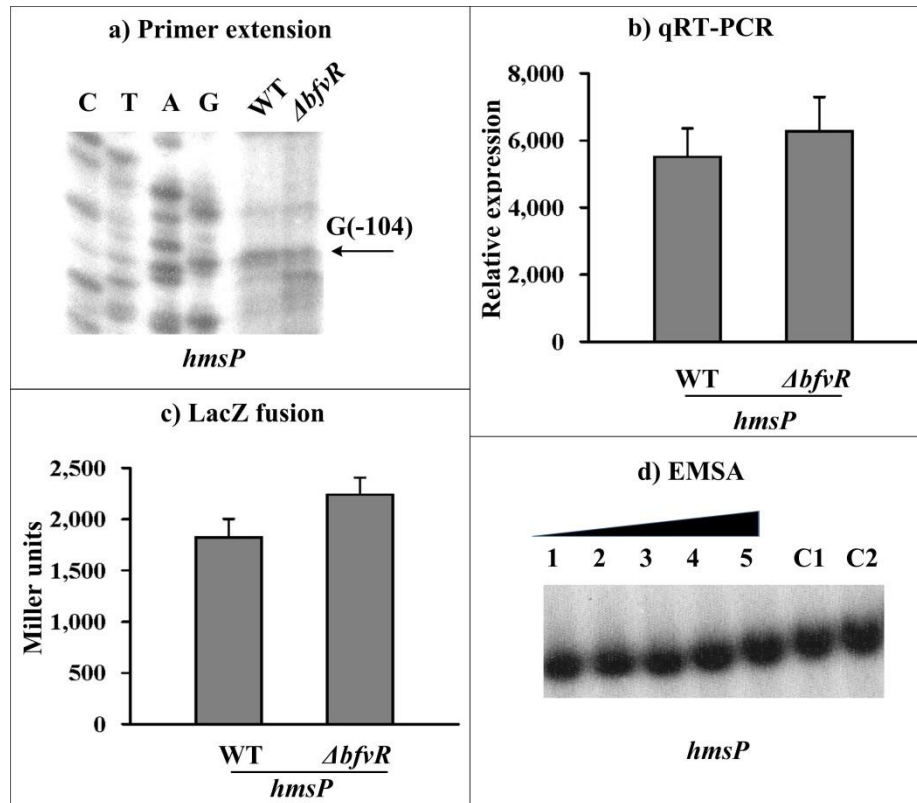

**FIGURE S3. Regulation of *hmsP* by BfvR.** See FIGURE 2 for the annotations of primer extension (a), quantitative RT-PCR (b), LacZ fusion (c), and EMSA (d). The promoter-proximal region was amplified from -659 to +65.

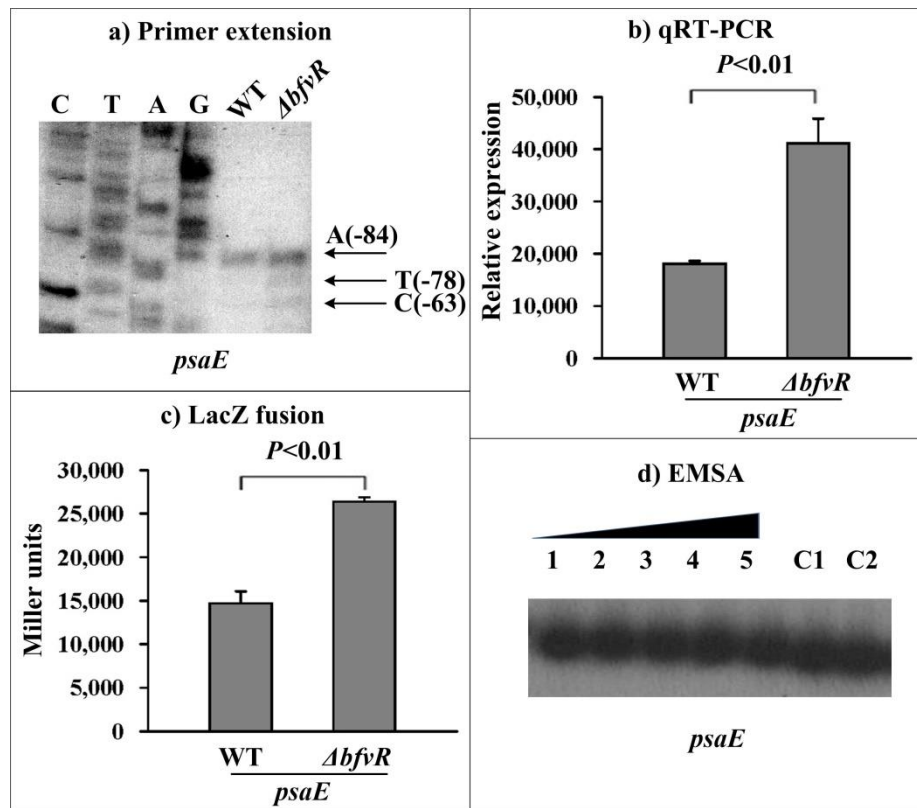

**FIGURE S4. Regulation of *psaE* by BfvR.** See FIGURE 2 for the annotations of primer extension (a), quantitative RT-PCR (b), LacZ fusion (c), and EMSA (d). The promoter-proximal region was amplified from -563 to +93.
